# Supplementary material for: Cep55 overexpression promotes genomic instability and tumorigenesis in mice
Source: PubMed Central journal article supplement (PMC7578791; doi:10.1038/s42003-020-01304-6), 2020-10-21
Supplement: 42003_2020_1304_MOESM2_ESM.pdf [file 42003_2020_1304_MOESM2_ESM.pdf]

## **Description of Additional Supplementary Files**

File Name: Supplementary Data 1

Description: Source data for all main figures.
